# Supplementary material for: An ICT-based ratiometric probe for hydrazine and its application in live cells
Source: Royal Society of Chemistry journal article supplement (doi:10.1039/c2cc34168a), 2012-01-01
Supplement: c2cc34168a.pdf [file c2cc34168a.pdf]

## Supporting Information

### An ICT-based Ratiometric Probe for Hydrazine and Its Application in Live cells

Jiangli Fan\*, Wen Sun, Mingming Hu, Jianfang Cao, Guanghui Cheng, Huijuan Dong,  
Kedong Song ,Yingchao Liu ,Shiguo Sun and Xiaojun Peng\*

State Key Laboratory of Fine Chemicals Dalian University of Technology, 2 Linggong Road,  
Dalian 116024, P.R. China  
fanjl@dlut.edu.cn; [pengxj@dlut.edu.cn](mailto:pengxj@dlut.edu.cn)

#### CONTENTS:

|                                                                            |    |
|----------------------------------------------------------------------------|----|
| 1. Materials and instruments                                               | 2  |
| 2. Cell incubation and fluorescence imaging                                | 2  |
| 3. Determination of the detection limit                                    | 2  |
| 4. Theoretical and Computational Methods                                   | 3  |
| 5. Synthetic procedures                                                    | 3  |
| 6. References                                                              | 4  |
| 7. UV/Fluorescence studies of compound <b>1</b>                            | 5  |
| 8. IR spectra of compound <b>1</b> and <b>1</b> upon addition of hydrazine | 11 |
| 9. TOF-MS of <b>1</b> upon addition of hydrazine                           | 11 |
| 10. Determination of hydrazine in water samples                            | 12 |
| 11. Fluorescence images of HeLa cells                                      | 12 |
| 12. Plots and tables of theoretical and computational study                | 14 |
| 13. NMR and MS data for compound <b>1</b>                                  | 20 |

## 1. Materials and instruments

All solvents used were of analytical grade without further purification.  $^1\text{H}$ -NMR and  $^{13}\text{C}$ -NMR spectra were recorded on a VARIAN INOVA-400 spectrometer, using TMS as an internal standard. Mass spectrometry data were obtained with a HP1100LC/MSD mass spectrometer and a LC/Q-TOF MS spectrometer. UV-visible spectra were collected on a Perkin Elmer Lambda 35 UV-Vis spectrophotometer. Fluorescence measurements were performed on a VAEIAN CARY Eclipse Fluorescence Spectrophotometer (Serial No. FL1109-M018) with slit widths were set at 10 nm and 10 nm for excitation and emission, respectively.

## 2. Cell incubation and fluorescence imaging

HeLa cells were seeded onto the cover slips at a concentration of  $2 \times 10^4 \text{ cells} \cdot \text{mL}^{-1}$  and cultured in DMEM in an incubator ( $37^\circ\text{C}$ , 5%  $\text{CO}_2$  and 20%  $\text{O}_2$ ). After 24 hours, the cover slips were rinsed slightly 3 times with PBS to remove the media and then cultured in PBS for later use. In respect to the verification procedure, 5  $\mu\text{M}$  of probe **1** was added to above cellular samples and incubated for 30 min, then the samples were slightly rinsed 3 times with PBS and observed under a Olympus FV1000-IX81 confocal fluorescence microscope, confocal fluorescence image  $100\times$  objective lens. And then the cells were incubated with hydrazine (25  $\mu\text{M}$ ) in the medium for another 2 hours, then the samples were slightly rinsed 3 times with PBS and observed under the confocal fluorescent microscope to get pictures with white light and fluorescence, respectively.

## 3. Determination of the detection limit

The detection limit was calculated based on the method reported in the previous literature <sup>[S1]</sup>. The fluorescence emission spectrum of **1** was measured by three times and the standard deviation of blank measurement was achieved. The fluorescence ratio at 564 nm and 639 nm was plotted as a concentration of hydrazine. The detection limit was calculated by using detection limit =  $3\sigma/k$ : Where  $\sigma$  is the standard deviation of blank measurement, k is the slope between the fluorescence ratios versus hydrazine concentration.

#### 4. Theoretical and Computational Methods

All the calculations on compound **1** and the corresponding product were carried out with the B3P86/TZVP level of Gaussian 09 program<sup>[S2]</sup> by using density function theory (DFT) and time-dependent density function theory (TD-DFT). Geometries for reactant and product were fully optimized without symmetry constraints. A continuum solvation model, COSMO (conductor-like screening model), is used for the consideration of solvent effects in aqueous solution<sup>[S3]</sup>.

#### 5. Synthetic procedures

**Scheme S1.** Synthesis of compound

Compound **2** was synthesized according to our previous reported method<sup>[S4]</sup>.

**Scheme S2.** Synthesis of probe **1**

#### Synthesis

##### 2-((7-(diethylamino)-2-oxo-2H-benzo[b][1,4]oxazin-3-yl)methylene)malononitrile **1**

A solution of **2** (100 mg, 0.41 mmol) and malononitrile (40 mg, 0.61 mmol) in acetonitrile (15 mL) was stirred at 85°C for about 4 hours. The solvents was dried in vacuo and the crude product was subjected to column chromatography (eluted with n-hexane: ethyl acetate=1/1, v/v) to afford the desired product as a deep purple solid (101 mg, 84% yield). <sup>1</sup>H NMR (CDCl<sub>3</sub>, 400 MHz), δ (ppm): 8.03 (s, 1H), 7.64 (d, 1H, J=9.4 Hz), 6.78 (q, 1H, J=2.64 Hz), 6.44 (d, 1H, J=2.64 Hz), 3.56 (q, 4H, J=7.16 Hz), 1.31 (t, 6H, J=7.12 Hz), <sup>13</sup>C NMR (CDCl<sub>3</sub>, 100 MHz), δ 154.08, 153.20, 151.69, 148.59, 133.40, 132.17, 125.24, 114.58, 112.86, 112.21, 97.04, 82.34, 45.95, 12.66.

TOF-MS:  $[M+Na]^+$  317.1014; found 317.1010.

## 6. References

- [S1] B. Zhu, C. Gao, Y. Zhao, C. Liu, Y. Li, Q. Wei, Z. Ma, B. Du, X. Zhang, *Chem. Commun.* **2011**, 47, 8656-8658.
- [S2] The Gaussian 09 package refer to Gaussian 09, Revision A.02, M. J. Frisch, G. W. Trucks, H. B. Schlegel, G. E. Scuseria, M. A. Robb, J. R. Cheeseman, G. Scalmani, V. Barone, B. Mennucci, G. A. Petersson, H. Nakatsuji, M. Caricato, X. Li, H. P. Hratchian, A. F. Izmaylov, J. Bloino, G. Zheng, J. L. Sonnenberg, M. Hada, M. Ehara, K. Toyota, R. Fukuda, J. Hasegawa, M. Ishida, T. Nakajima, Y. Honda, O. Kitao, H. Nakai, T. Vreven, J. A. Montgomery, Jr., J. E. Peralta, F. Ogliaro, M. Bearpark, J. J. Heyd, E. Brothers, K. N. Kudin, V. N. Staroverov, R. Kobayashi, J. Normand, K. Raghavachari, A. Rendell, J. C. Burant, S. S. Iyengar, J. Tomasi, M. Cossi, N. Rega, J. M. Millam, M. Klene, J. E. Knox, J. B. Cross, V. Bakken, C. Adamo, J. Jaramillo, R. Gomperts, R. E. Stratmann, O. Yazyev, A. J. Austin, R. Cammi, C. Pomelli, J. W. Ochterski, R. L. Martin, K. Morokuma, V. G. Zakrzewski, G. A. Voth, P. Salvador, J. J. Dannenberg, S. Dapprich, A. D. Daniels, O. Farkas, J. B. Foresman, J. V. Ortiz, J. Cioslowski and D. J. Fox, Gaussian, Inc., Wallingford CT, 2009.
- [S3] A. Klamt, *J. Phys. Chem.* **1996**, 100, 3349-3353.
- [S4] M. Hu, J. Fan, H. Li, K. Song, S. Wang, G. Cheng and X. Peng, *Org. Biomol. Chem.* **2011**, 9, 980-983.

## 7. UV/Fluorescence studies of compound **1**

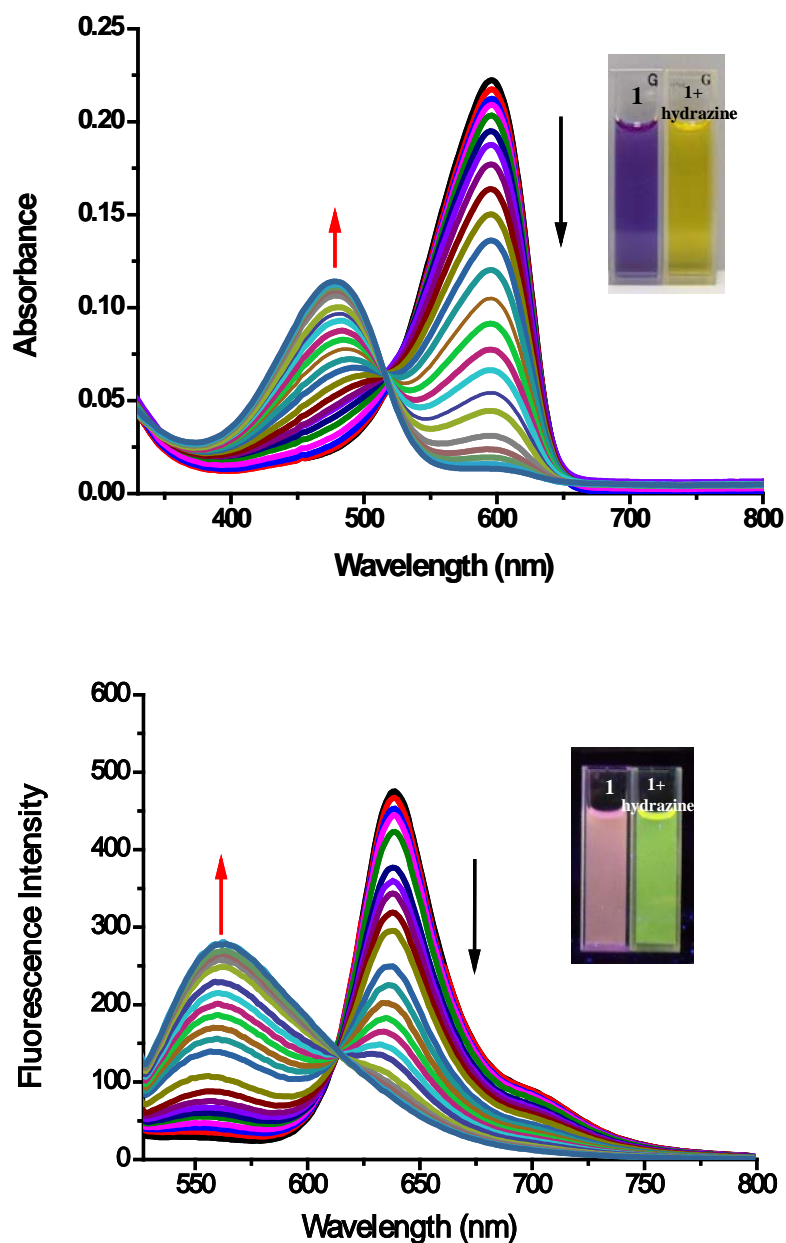

**Figure S1.** Uv-vis spectra (top) and FL spectra (bottom) of probe **1** in the presence of different concentrations of hydrazine, probe **1** = 5 μM, hydrazine = 0, 0.5, 1.0, 1.5,.....3.5, 5.0, 6.5, 8.0, 9.5,....., 26.0 μM, in a mixture of acetate buffer (pH 3.7, 10 mM) and DMSO (1/9, v/v). Each spectrum was recorded after 20 min. The arrows indicate the change of the absorption and the emission with the increase of hydrazine,  $\lambda_{\text{ex}} = 510$  nm. The inset shows the color/fluorescence change before and after the addition of hydrazine.

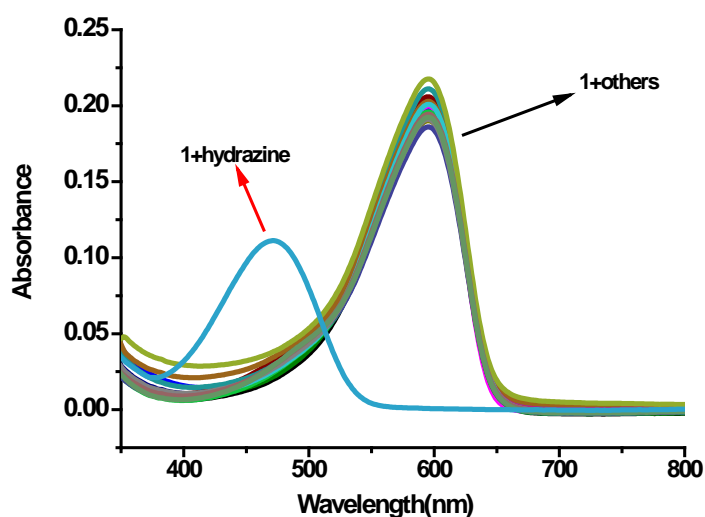

**Figure S2.** UV-vis spectra of probe **1** in the presence of hydrazine, representative metal ions and anions. probe **1** = 5  $\mu\text{M}$ , hydrazine = 25  $\mu\text{M}$ . 100  $\mu\text{M}$  for  $\text{Na}^+$ ,  $\text{Cl}^-$ ,  $\text{Br}^-$ ,  $\text{I}^-$ ,  $\text{SO}_4^{2-}$ ,  $\text{ClO}_4^-$ ; 50  $\mu\text{M}$  for  $\text{Ag}^+$ ,  $\text{Cu}^{2+}$ ,  $\text{Co}^{2+}$ ,  $\text{Ba}^{2+}$ ,  $\text{Mg}^{2+}$ ,  $\text{Cd}^{2+}$ ,  $\text{Pb}^{2+}$ ,  $\text{Hg}^{2+}$ ,  $\text{Zn}^{2+}$ ,  $\text{Fe}^{3+}$ ,  $\text{SO}_3^{2-}$ ,  $\text{HCO}_3^-$ ,  $\text{SCN}^-$ ,  $\text{HPO}_4^{2-}$ . In a mixture of acetate buffer (pH 3.7, 10 mM) and DMSO (1/9, v/v). Measured after 20 min of mixing.

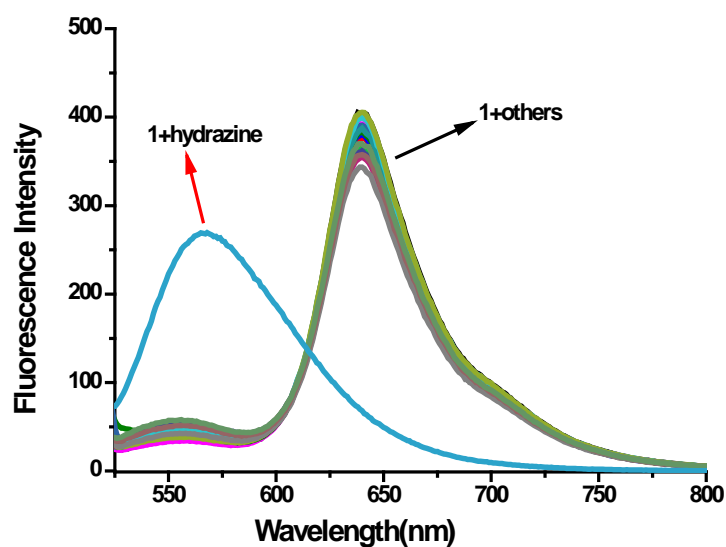

**Figure S3.** Fluorescence spectra of probe **1** in the presence of hydrazine, representative metal ions and anions. probe **1** = 5  $\mu\text{M}$ , hydrazine = 25  $\mu\text{M}$ . 100  $\mu\text{M}$  for  $\text{Na}^+$ ,  $\text{Cl}^-$ ,  $\text{Br}^-$ ,  $\text{I}^-$ ,  $\text{SO}_4^{2-}$ ,  $\text{ClO}_4^-$ ; 50  $\mu\text{M}$  for  $\text{Ag}^+$ ,  $\text{Cu}^{2+}$ ,  $\text{Co}^{2+}$ ,  $\text{Ba}^{2+}$ ,  $\text{Mg}^{2+}$ ,  $\text{Cd}^{2+}$ ,  $\text{Pb}^{2+}$ ,  $\text{Hg}^{2+}$ ,  $\text{Zn}^{2+}$ ,  $\text{Fe}^{3+}$ ,  $\text{SO}_3^{2-}$ ,  $\text{HCO}_3^-$ ,  $\text{SCN}^-$ ,  $\text{HPO}_4^{2-}$ . In a mixture of acetate buffer (pH 3.7, 10 mM) and DMSO (1/9, v/v). Measured after 20 min of mixing.

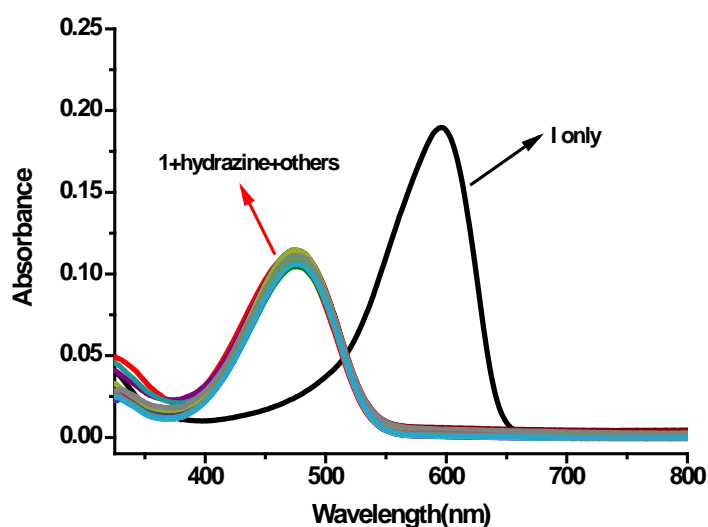

**Figure S4.** UV-vis spectra of 1-hydrazine system in the presence representative metal ions and anions. probe **1** = 5  $\mu\text{M}$ , hydrazine = 25  $\mu\text{M}$ , 100  $\mu\text{M}$  for  $\text{Na}^+$ ,  $\text{Cl}^-$ ,  $\text{Br}^-$ ,  $\text{I}^-$ ,  $\text{SO}_4^{2-}$ ,  $\text{ClO}_4^-$ , 50  $\mu\text{M}$  for  $\text{Ag}^+$ ,  $\text{Cu}^{2+}$ ,  $\text{Co}^{2+}$ ,  $\text{Ba}^{2+}$ ,  $\text{Mg}^{2+}$ ,  $\text{Cd}^{2+}$ ,  $\text{Pb}^{2+}$ ,  $\text{Hg}^{2+}$ ,  $\text{Zn}^{2+}$ ,  $\text{Fe}^{3+}$ ,  $\text{SO}_3^{2-}$ ,  $\text{HCO}_3^-$ ,  $\text{SCN}^-$ ,  $\text{HPO}_4^{2-}$ . In a mixture of acetate buffer (pH 3.7, 10 mM) and DMSO (1/9, v/v). Measured after 20 min of mixing.

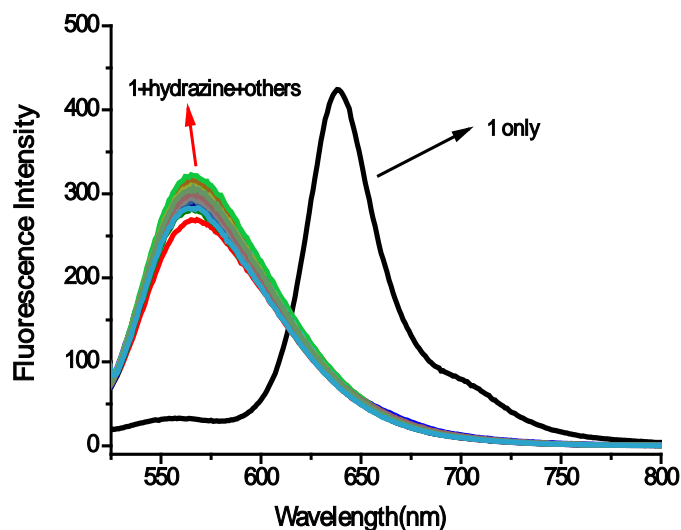

**Figure S5.** Fluorescence spectra of 1-hydrazine system in the presence representative metal ions and anions. probe **1** = 5  $\mu\text{M}$ , hydrazine = 25  $\mu\text{M}$ , 100  $\mu\text{M}$  for  $\text{Na}^+$ ,  $\text{Cl}^-$ ,  $\text{Br}^-$ ,  $\text{I}^-$ ,  $\text{SO}_4^{2-}$ ,  $\text{ClO}_4^-$ , 50  $\mu\text{M}$  for  $\text{Ag}^+$ ,  $\text{Cu}^{2+}$ ,  $\text{Co}^{2+}$ ,  $\text{Ba}^{2+}$ ,  $\text{Mg}^{2+}$ ,  $\text{Cd}^{2+}$ ,  $\text{Pb}^{2+}$ ,  $\text{Hg}^{2+}$ ,  $\text{Zn}^{2+}$ ,  $\text{Fe}^{3+}$ ,  $\text{SO}_3^{2-}$ ,  $\text{HCO}_3^-$ ,  $\text{SCN}^-$ ,  $\text{HPO}_4^{2-}$ . In a mixture of acetate buffer (pH 3.7, 10 mM) and DMSO (1/9, v/v). Measured after 20 min of mixing.

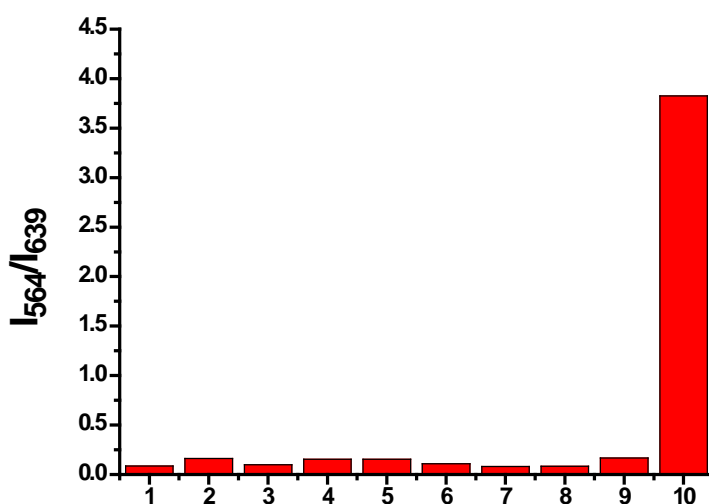

**Figure S6.** Fluorescence ratios responses of probe **1** (5  $\mu\text{M}$ ) to various compounds (500  $\mu\text{M}$  for Cys, GSH, thiourea, mercaptonethanol; 50  $\mu\text{M}$  for  $\text{NH}_4^+$ , lysine, glutamine; 25  $\mu\text{M}$  for  $\text{NH}_3 \cdot \text{H}_2\text{O}$ ) and hydrazine (25  $\mu\text{M}$ ) at 564 nm and 639 nm. Conditions: acetate buffer (pH 3.7, 10 mM) and DMSO (1/9, v/v). Each spectrum was recorded after 20 min.  $\lambda_{\text{ex}} = 510 \text{ nm}$ . 1.blank, 2.Cys, 3.GSH, 4.thiourea, 5.mercaptoethanol, 6.lysine, 7.glutamine, 8. $\text{NH}_4^+$ , 9. $\text{NH}_3 \cdot \text{H}_2\text{O}$  and 10.hydrazine.

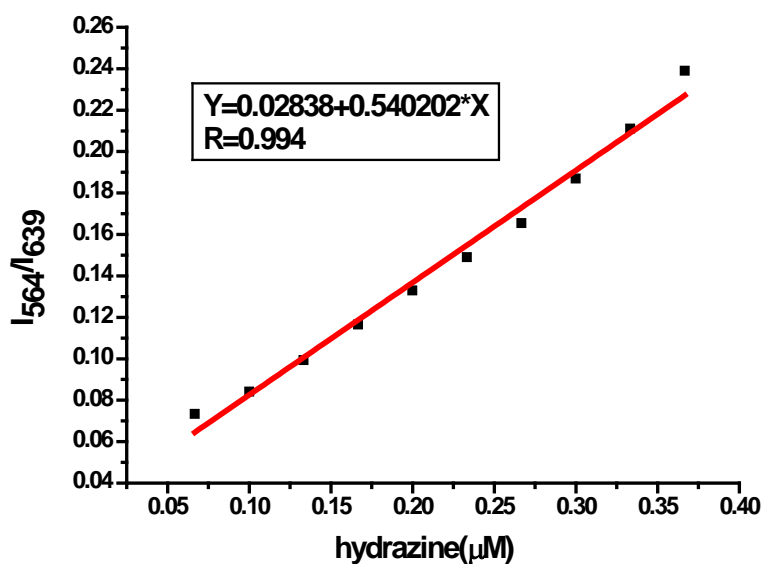

**Figure S7.** The fluorescence ratios of probe **1** (5  $\mu\text{M}$ ) was linearly related to the concentration of hydrazine (0.07–0.37  $\mu\text{M}$ ) in DMSO.  $Y = 0.02838 + 0.54020 \times X$ ,  $R = 0.994$ .



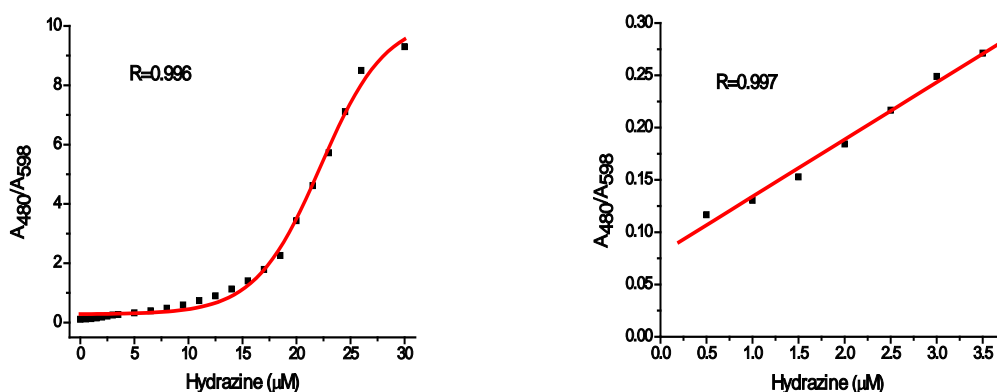

**Figure S8.** (a) Plot of absorption ratios at 480 nm and 598 nm of probe **1** ( $5\ \mu\text{M}$ ) upon varied concentrations of hydrazine ( $0\text{--}30\ \mu\text{M}$ ). (b) The absorption ratios of probe **1** ( $5\ \mu\text{M}$ ) was linearly related to the concentration of hydrazine ( $0.5\text{--}3.5\ \mu\text{M}$ ). In a mixture of acetate buffer (pH 3.7, 10 mM) and DMSO (1/9, v/v). Measured after 20 min of mixing.

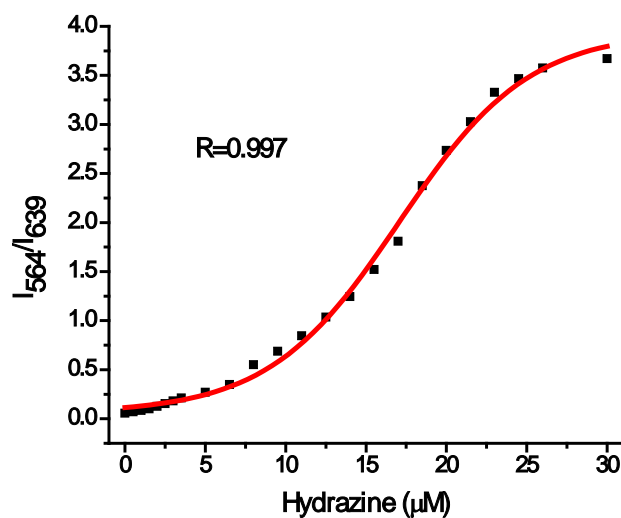

**Figure S9.** (a) Plot of fluorescence ratios at 564 nm and 639 nm of probe **1** ( $5\ \mu\text{M}$ ) upon varied concentrations of hydrazine ( $0\text{--}30\ \mu\text{M}$ ). In a mixture of acetate buffer (pH 3.7, 10 mM) and DMSO (1/9, v/v). Measured after 20 min of mixing.

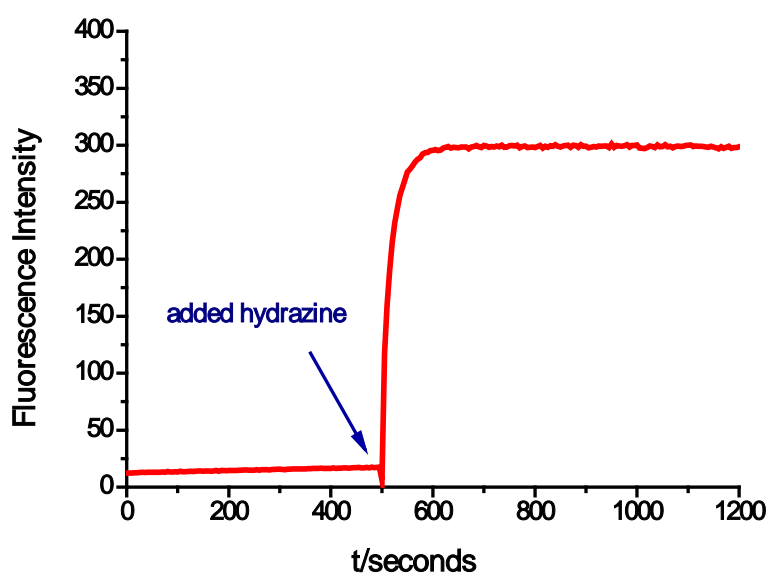

**Figure S10.** Time-dependent fluorescence changes of **1** with hydrazine. probe **1** = 5  $\mu\text{M}$ , hydrazine = 25  $\mu\text{M}$ . in DMSO.  $\lambda_{\text{ex}}$  = 510 nm,  $\lambda_{\text{em}}$  = 564 nm.

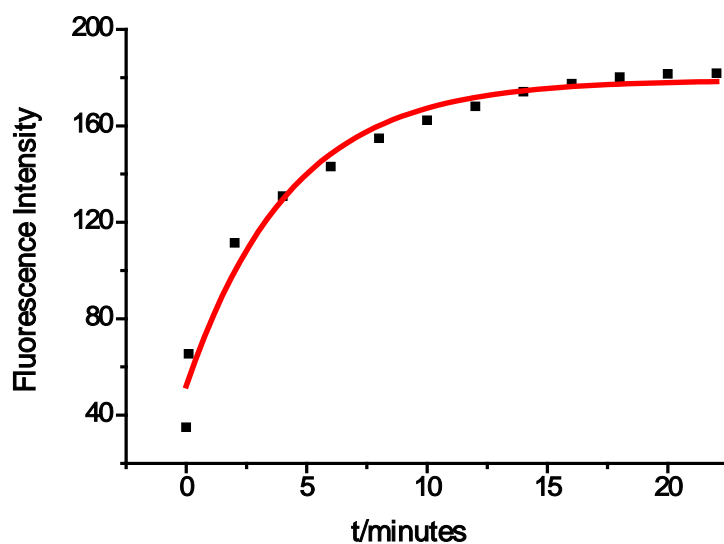

**Figure S11.** Time-dependent fluorescence changes of **1** with hydrazine. probe **1** = 5  $\mu\text{M}$ , hydrazine = 50  $\mu\text{M}$  in a mixture of acetate buffer (pH 3.7, 10 mM) and DMSO (1/9 v/v).  $\lambda_{\text{ex}}$  = 510 nm,  $\lambda_{\text{em}}$  = 564 nm.

## 8. IR spectra of compound **1** and **1** upon addition of hydrazine

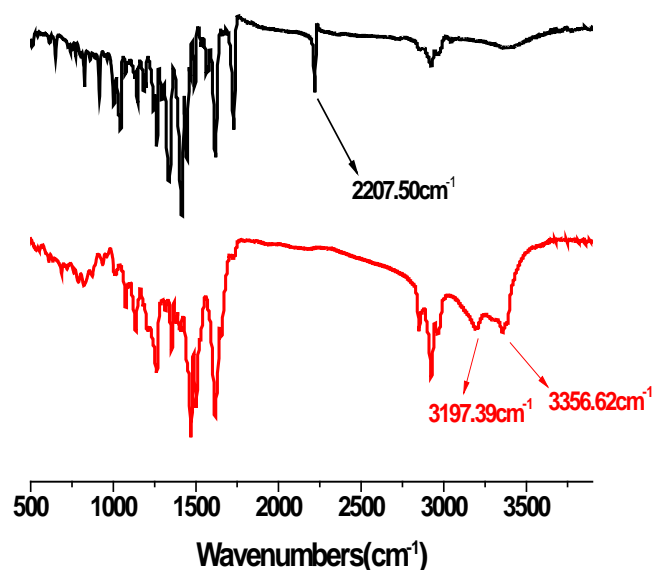

**Figure S12.** IR spectra of probe **1** (black line), **1** upon addition of hydrazine (red line). **1** showed a sharp band assigned to the C≡N stretching vibrations at 2207.50 cm<sup>-1</sup>. In the presence of hydrazine, the band disappeared in the product and there emerged two new bands at 3356.62 cm<sup>-1</sup> and 3197.39 cm<sup>-1</sup> assigned to the N-H stretching vibration.

## 9. TOF-MS of **1** upon addition of hydrazine

**Single Mass Analysis (displaying only valid results)**  
Tolerance = 5.0 PPM / DBE: min = -20.0, max = 200.0  
Selected filters: None

Monoisotopic Mass, Even Electron Ions  
6 formula(e) evaluated with 1 results within limits (all results (up to 1000) for each mass)  
Elements Used:  
C: 0-100 H: 0-120 N: 4-4 O: 2-2

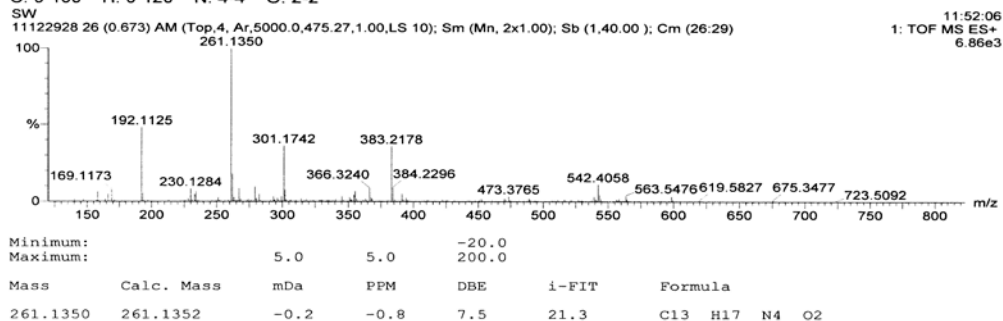

**Figure S13.** TOF-MS of compound **1** upon addition of hydrazine. TOF-MS:[M+H]<sup>+</sup> 261.1352;

found 261.1350. The result indicates that the formula of the corresponding compound is  $C_{13}H_{16}N_4O_2$ .

## 10. Determination of hydrazine in water samples.

**Table S1.** Determination of hydrazine in water samples

| Samples        | Hydrazine<br>Added<br>( $10^{-7}$ mol L $^{-1}$ ) | Proposed method <sup>a</sup>         |                 | Electrocatalytic oxidation <sup>b</sup> |                 |
|----------------|---------------------------------------------------|--------------------------------------|-----------------|-----------------------------------------|-----------------|
|                |                                                   | Found<br>( $10^{-7}$ mol L $^{-1}$ ) | Recovery<br>(%) | Found<br>( $10^{-7}$ mol L $^{-1}$ )    | Recovery<br>(%) |
| Drinking water | 10                                                | 10.3                                 | 103.1           | 10.2                                    | 101.6           |
|                | 20                                                | 20.7                                 | 103.5           | 19.3                                    | 98.5            |
|                | 30                                                | 29.6                                 | 98.7            | 31.6                                    | 105.1           |
| River water    | 10                                                | 9.7                                  | 97.0            | 9.8                                     | 98.0            |
|                | 20                                                | 19.5                                 | 97.4            | 21.2                                    | 106.0           |
|                | 30                                                | 31.2                                 | 104.1           | 29.9                                    | 99.7            |

a. Conditions:  $I_{564}/I_{639}$ , probe **1** (5  $\mu$ M), 20 min reaction at room temperature. The samples were first adjust to pH 3.7 acetate buffer and then different concentrations of hydrazine were obtained by diluting the solution into a co-solvent (acetate buffer/DMSO = 1/9).

b. S. Wu, F. Nie, Q. Chen and J. Sun, *Anal. Methods*, **2010**, 2, 1729–1736.

## 11. Fluorescence images of HeLa cells

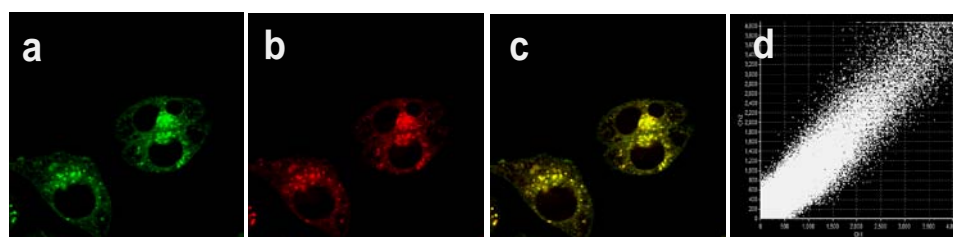

**Figure S14.** Intracellular distribution of **1** (10  $\mu$ M) compared with lysosensor green (1  $\mu$ M). (a) Fluorescence image of lysosensor green; (b) fluorescence image of **1**; (c) merging of a and b; (d) colocalization coefficient of **1** and lysosensor green is 0.9628. The excitation wavelength of lysosensor and probe **1** are 488 nm and 559 nm, respectively.

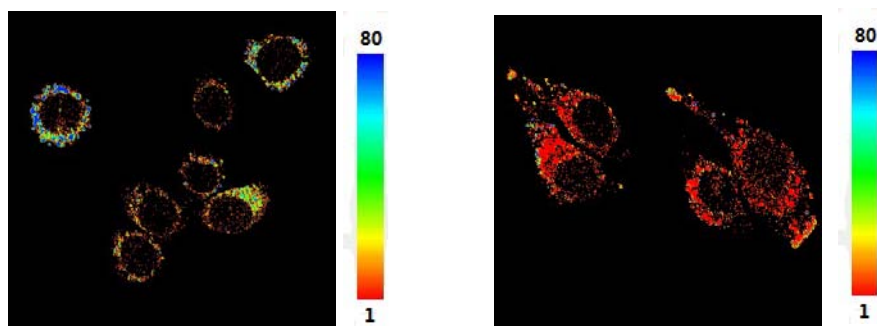

**Figure S15.** The fluorescence ratio ( $F_{620-660}/F_{520-560}$ ) images of HeLa cells stained with probe **1** and hydrazine. (left) Image of cells after treatment with **1** (5  $\mu\text{M}$ ) for 0.5 h. (right) Image of cells after treatment with **1** (5  $\mu\text{M}$ ) for 0.5 h and subsequent treatment of the cells with 25  $\mu\text{M}$  hydrazine for 2h. The ratiometric images were obtained by the image analysis software of Image Pro-plus 6.0.

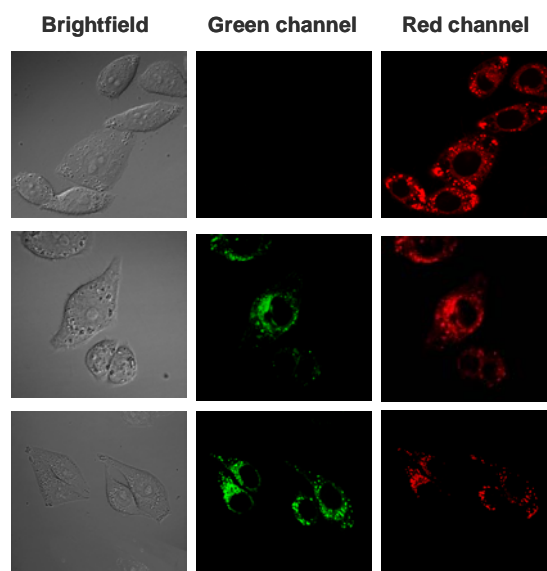

**Figure S16.** Confocal fluorescence images of HeLa cells. Cells incubated with probe **1** (5  $\mu\text{M}$ ) for 0.5 h (top); image of cells after treatment with probe **1** (5  $\mu\text{M}$ ) for 0.5 h and subsequent treatment of the cells with 10  $\mu\text{M}$  (middle) and 25  $\mu\text{M}$  (bottom) hydrazine for 2 h. green emission ( $540 \pm 20$  nm); red emission ( $640 \pm 20$  nm).  $\lambda_{\text{exc}} = 515$  nm. The figure shows that fluorescence in the green channel obviously increased while the red fluorescence intensity decreased with the increasing of the concentration of hydrazine.

## 12. Plots and tables of theoretical and computational study

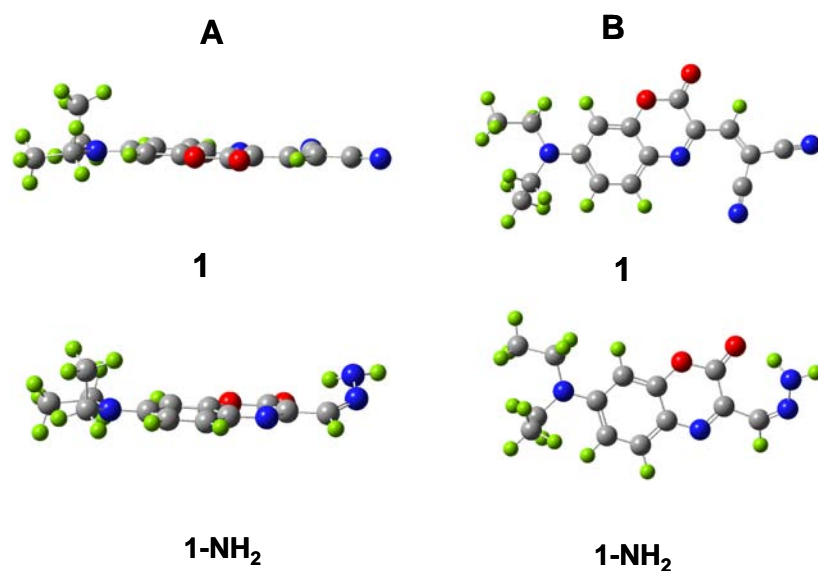

**Figure S17.** Optimized ground-state geometries of the reactant **1** and the corresponding product **1-NH<sub>2</sub>**. A) The side-view; B) The top-view

**Table S2.** Experimental and theoretical spectra of compound **1** and the responding compound **1-NH<sub>2</sub>**.

| Compound | Exptl $\lambda(\text{nm})$ |     | Calcd $\lambda(\text{nm})$ |     |
|----------|----------------------------|-----|----------------------------|-----|
|          | Abs.                       | Fl. | Abs.                       | Fl. |
| reactant | 598                        | 639 | 516                        | 614 |
| product  | 480                        | 564 | 471                        | 597 |

**Table S3.** Selected electronic excitation energies (eV), oscillator strengths (f), main configurations, and CI coefficients of the low-lying excited states of the reactant **1** and the corresponding product **1-NH<sub>2</sub>**. The data were calculated by TDDFT//B3P86/TZVP based on the optimized ground state geometries.

| compoud  | Electronic Transition          | TDDFT //B3P86/TZVP             |                |                          |                  |
|----------|--------------------------------|--------------------------------|----------------|--------------------------|------------------|
|          |                                | Excitation Energy <sup>a</sup> | f <sup>b</sup> | Composition <sup>c</sup> | CI <sup>d</sup>  |
| reactant | S <sub>0</sub> →S <sub>1</sub> | 2.40 eV<br>516 nm              | 1.1798         | H→L                      | 0.7103           |
|          | S <sub>0</sub> →S <sub>2</sub> | 3.19 eV<br>388 nm              | 0.0009         | H-3→L                    | 0.6170           |
|          | S <sub>0</sub> →S <sub>3</sub> | 3.28 eV<br>378 nm              | 0.0031         | H-1→L                    | 0.6799           |
|          | S <sub>0</sub> →S <sub>4</sub> | 3.79 eV<br>327 nm              | 0.0333         | H-2→L<br>H→L+1           | 0.4445<br>0.4793 |
|          | S <sub>0</sub> →S <sub>5</sub> | 3.98 eV<br>311 nm              | 0.1173         | H-1→L+1                  | 0.5048           |
|          | S <sub>0</sub> →S <sub>6</sub> | 4.62 eV<br>268 nm              | 0.0155         | H→L+2                    | 0.6883           |
| product  | S <sub>0</sub> →S <sub>1</sub> | 2.63 eV<br>471 nm              | 0.7554         | H→L                      | 0.7020           |
|          | S <sub>0</sub> →S <sub>2</sub> | 3.48 eV<br>356 nm              | 0.0282         | H-1→L                    | 0.6739           |
|          | S <sub>0</sub> →S <sub>3</sub> | 3.72 eV<br>333 nm              | 0.0013         | H-3→L                    | 0.5965           |
|          | S <sub>0</sub> →S <sub>4</sub> | 3.86 eV<br>321 nm              | 0.0155         | H-2→L                    | 0.6501           |
|          | S <sub>0</sub> →S <sub>5</sub> | 4.15 eV<br>298 nm              | 0.0058         | H-4→L                    | 0.6276           |
|          | S <sub>0</sub> →S <sub>6</sub> | 4.19 eV<br>295 nm              | 0.2091         | H→L+1                    | 0.6625           |

[a] Only selected excited states were considered. The numbers in parentheses are the excitation energy in wavelength. [b] Oscillator strength . [c] H stands for HOMO and L stands for LUMO. [d]The CI coefficients are in absolute values.

#### XYZ coordinates (angstrom)

Note: upper case letters before the atomic coordinates indicate the atomic symbol of the atoms in involved in the calculations.

#### Reactant in the S<sub>0</sub> state

|   |            |             |             |
|---|------------|-------------|-------------|
| C | 2.55695200 | -0.21940900 | -0.17591900 |
| C | 1.87102200 | -1.47991900 | -0.23914200 |
| C | 0.51543000 | -1.54761500 | -0.21044500 |

|                                      |             |             |             |
|--------------------------------------|-------------|-------------|-------------|
| C                                    | -0.27921600 | -0.37861800 | -0.09847300 |
| C                                    | 0.41001700  | 0.86022400  | -0.01724300 |
| C                                    | 1.76954000  | 0.95642100  | -0.04523300 |
| N                                    | -1.60524400 | -0.44208700 | -0.06699500 |
| C                                    | -2.31287400 | 0.67084700  | 0.04766900  |
| C                                    | -1.68464500 | 1.98957700  | 0.15385900  |
| O                                    | -0.31495000 | 2.00409100  | 0.10957200  |
| O                                    | -2.24959300 | 3.05002500  | 0.27407700  |
| C                                    | -3.73172300 | 0.64058300  | 0.07403900  |
| C                                    | -4.55545900 | -0.44764400 | -0.00523900 |
| C                                    | -5.96201300 | -0.25813100 | 0.03503600  |
| N                                    | -7.10712300 | -0.10994800 | 0.06689700  |
| C                                    | -4.13777700 | -1.79853100 | -0.12873500 |
| N                                    | -3.89310900 | -2.92277700 | -0.22898100 |
| N                                    | 3.89584900  | -0.14687200 | -0.23735500 |
| C                                    | 4.72156600  | -1.35443800 | -0.22892100 |
| C                                    | 4.54884400  | 1.16817600  | -0.10865900 |
| C                                    | 6.03292700  | 1.18855900  | -0.40514000 |
| C                                    | 4.96562000  | -1.89852300 | 1.17032200  |
| H                                    | 2.43192000  | -2.39878000 | -0.31112900 |
| H                                    | 0.00892600  | -2.50331300 | -0.26409300 |
| H                                    | 2.21410500  | 1.93567500  | 0.04043600  |
| H                                    | -4.21770100 | 1.60457700  | 0.16740800  |
| H                                    | 5.66605300  | -1.10818800 | -0.70534100 |
| H                                    | 4.25513000  | -2.10411000 | -0.86533200 |
| H                                    | 4.37016700  | 1.54691900  | 0.90311900  |
| H                                    | 4.05235800  | 1.84995800  | -0.80105800 |
| H                                    | 6.37021100  | 2.22214500  | -0.31400600 |
| H                                    | 6.25133900  | 0.85692300  | -1.42127100 |
| H                                    | 6.61290200  | 0.58963600  | 0.29728900  |
| H                                    | 5.59946900  | -2.78515100 | 1.11204300  |
| H                                    | 4.02967200  | -2.17825200 | 1.65703300  |
| H                                    | 5.46991100  | -1.15852700 | 1.79409200  |
| Reactant in the S <sub>1</sub> state |             |             |             |
| C                                    | 2.55950000  | -0.22688400 | -0.18465600 |
| C                                    | 1.88242400  | -1.48287900 | -0.24782500 |
| C                                    | 0.51707700  | -1.55057500 | -0.20905500 |
| C                                    | -0.27992700 | -0.39092400 | -0.10174600 |
| C                                    | 0.40204700  | 0.84045900  | -0.02705500 |
| C                                    | 1.76864600  | 0.94281300  | -0.06258300 |
| N                                    | -1.63434200 | -0.47892000 | -0.06928800 |
| C                                    | -2.31924100 | 0.65843900  | 0.05039400  |
| C                                    | -1.66950700 | 1.98313000  | 0.15623600  |



|   |             |             |             |
|---|-------------|-------------|-------------|
| O | -0.30986300 | 2.00276400  | 0.10183500  |
| O | -2.24098900 | 3.03881200  | 0.28209600  |
| C | -3.72681400 | 0.67197000  | 0.08066200  |
| C | -4.56064500 | -0.43712700 | -0.00194100 |
| C | -5.96014900 | -0.24575000 | 0.03530300  |
| N | -7.10692100 | -0.08571700 | 0.06563900  |
| C | -4.15785200 | -1.78567200 | -0.12329900 |
| N | -3.94371200 | -2.92022700 | -0.22258500 |
| N | 3.91340700  | -0.14479500 | -0.23926900 |
| C | 4.73766400  | -1.34445700 | -0.22990000 |
| C | 4.55505200  | 1.16897400  | -0.12220500 |
| C | 6.04571200  | 1.19753600  | -0.37781100 |
| C | 4.97148400  | -1.89518000 | 1.17477200  |
| H | 2.44011400  | -2.40370700 | -0.32513000 |
| H | 0.01585300  | -2.50902700 | -0.26041500 |
| H | 2.20603000  | 1.92642700  | 0.01672300  |
| H | -4.20496800 | 1.63742900  | 0.17551600  |
| H | 5.68847500  | -1.09472100 | -0.69223300 |
| H | 4.27516700  | -2.09698400 | -0.86681700 |
| H | 4.34569400  | 1.56438300  | 0.88004500  |
| H | 4.06562300  | 1.83984900  | -0.83274800 |
| H | 6.37111100  | 2.23473500  | -0.28627300 |
| H | 6.29370900  | 0.85949600  | -1.38494300 |
| H | 6.60986800  | 0.60936900  | 0.34604200  |
| H | 5.60512500  | -2.78130100 | 1.10862400  |
| H | 4.03031900  | -2.17614900 | 1.64958600  |
| H | 5.47284300  | -1.15803100 | 1.80334200  |

Product in the S<sub>0</sub> state

|   |             |             |             |
|---|-------------|-------------|-------------|
| C | -2.02556700 | -0.22462300 | -0.22794400 |
| C | -1.63631200 | -1.59241200 | -0.36531600 |
| C | -0.32167100 | -1.96022900 | -0.41171100 |
| C | 0.70792800  | -1.00405500 | -0.32060300 |
| C | 0.31465400  | 0.33557900  | -0.17536900 |
| C | -0.99616600 | 0.73869700  | -0.12569900 |
| N | 2.00944300  | -1.35904900 | -0.32539600 |
| C | 2.94652100  | -0.45036600 | -0.19284100 |
| C | 2.61083100  | 0.97229500  | -0.14527700 |
| O | 1.28745400  | 1.28803400  | -0.09564400 |
| N | -3.33225900 | 0.14113800  | -0.20727500 |
| C | -4.38418500 | -0.86351500 | -0.08828200 |
| C | -3.66310500 | 1.55228200  | 0.02564000  |
| C | -5.12135100 | 1.91328700  | -0.16790500 |
| C | -4.58951100 | -1.36388100 | 1.33403600  |

|   |             |             |             |
|---|-------------|-------------|-------------|
| O | 3.39266400  | 1.90350100  | -0.17461400 |
| C | 4.31826000  | -0.96654200 | -0.21467900 |
| N | 5.43723700  | -0.54686100 | 0.26209100  |
| N | 5.55930000  | 0.59003400  | 0.96581200  |
| H | -2.38776500 | -2.36464700 | -0.42617300 |
| H | -0.04651200 | -3.00319600 | -0.51322900 |
| H | -1.20166900 | 1.79027400  | 0.00238300  |
| H | -4.16042900 | -1.69095200 | -0.76064700 |
| H | -5.30401600 | -0.42344000 | -0.46437400 |
| H | -3.07231500 | 2.14954900  | -0.67195800 |
| H | -3.34624900 | 1.83736400  | 1.03647000  |
| H | -5.21847800 | 2.99165200  | -0.03237000 |
| H | -5.77647000 | 1.43033400  | 0.55788800  |
| H | -5.47002000 | 1.67141800  | -1.17348000 |
| H | -5.39194300 | -2.10403100 | 1.35507900  |
| H | -4.86574900 | -0.54353900 | 1.99933300  |
| H | -3.68393600 | -1.83193000 | 1.72448200  |
| H | 4.37108500  | -1.95513500 | -0.66171600 |
| H | 6.52466900  | 0.87361900  | 1.03779300  |
| H | 4.91084600  | 1.34444100  | 0.74166300  |

Product in the S<sub>1</sub> state

|   |             |             |             |
|---|-------------|-------------|-------------|
| C | -2.02640000 | -0.23547700 | -0.21824000 |
| C | -1.65182000 | -1.60405900 | -0.34320700 |
| C | -0.33547600 | -1.97711200 | -0.37099100 |
| C | 0.71837700  | -1.03455000 | -0.28963200 |
| C | 0.32822400  | 0.31733500  | -0.15561400 |
| C | -0.98114700 | 0.71939400  | -0.12259900 |
| N | 2.00539600  | -1.42264800 | -0.30767500 |
| C | 2.95022300  | -0.44260500 | -0.15649300 |
| C | 2.62791900  | 0.94502900  | -0.09610500 |
| O | 1.28546700  | 1.29211400  | -0.07259500 |
| N | -3.32895800 | 0.15347100  | -0.20021000 |
| C | -4.39655300 | -0.83549200 | -0.13192200 |
| C | -3.64735700 | 1.57015200  | 0.01106400  |
| C | -5.10271500 | 1.94472500  | -0.17333200 |
| C | -4.64939700 | -1.35362700 | 1.27885700  |
| O | 3.39595900  | 1.91598400  | -0.08822500 |
| C | 4.28214800  | -0.98989900 | -0.14224800 |
| N | 5.45780400  | -0.55257200 | 0.24847200  |
| N | 5.60333600  | 0.65599700  | 0.73275000  |
| H | -2.40628700 | -2.37371800 | -0.40367100 |
| H | -0.06954400 | -3.02369200 | -0.46200100 |
| H | -1.18237900 | 1.77404900  | -0.00958900 |

|   |             |             |             |
|---|-------------|-------------|-------------|
| H | -4.15880500 | -1.65727100 | -0.80656700 |
| H | -5.29911500 | -0.37640900 | -0.52621900 |
| H | -3.05187500 | 2.15288900  | -0.69523800 |
| H | -3.31950100 | 1.86019100  | 1.01728800  |
| H | -5.18521300 | 3.02369000  | -0.03354100 |
| H | -5.75776100 | 1.46729700  | 0.55591100  |
| H | -5.45991300 | 1.71163400  | -1.17771300 |
| H | -5.45701900 | -2.08788300 | 1.25826800  |
| H | -4.94243400 | -0.54105700 | 1.94586800  |
| H | -3.75888400 | -1.83328300 | 1.68827000  |
| H | 4.30650000  | -2.02696500 | -0.46023500 |
| H | 6.54946900  | 0.90775100  | 0.97645500  |
| H | 4.88215400  | 1.37537700  | 0.56867900  |

### 13. NMR and MS data for compound 1

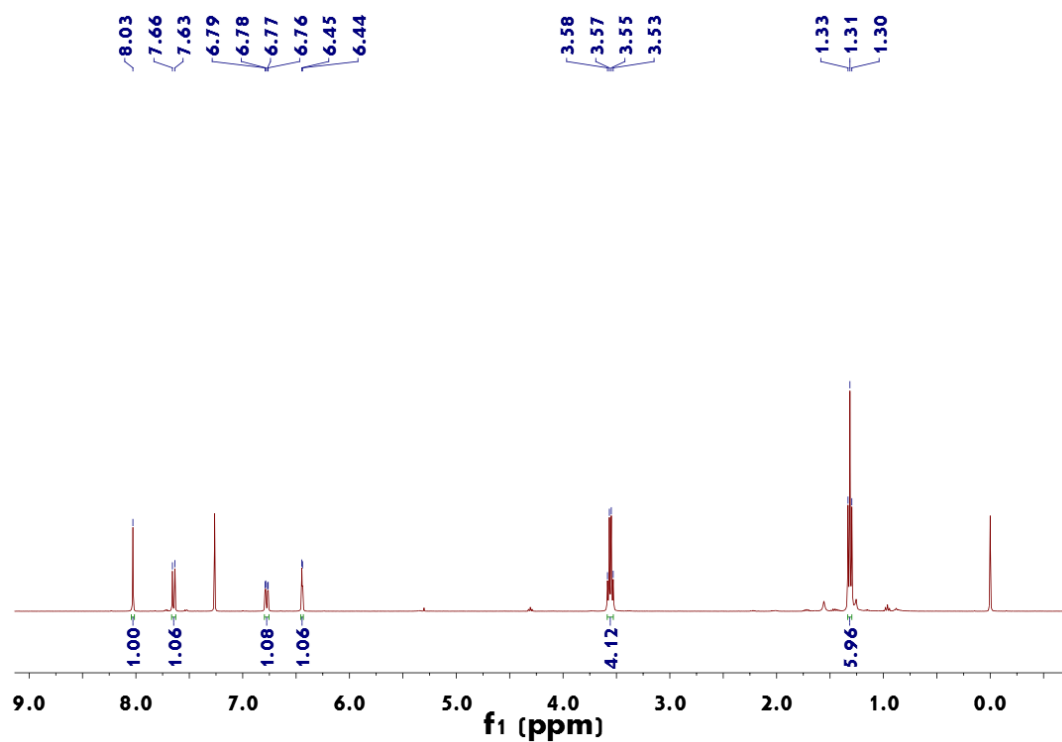

**Figure S18.** <sup>1</sup>H NMR spectrum of compound **1** in CDCl<sub>3</sub>

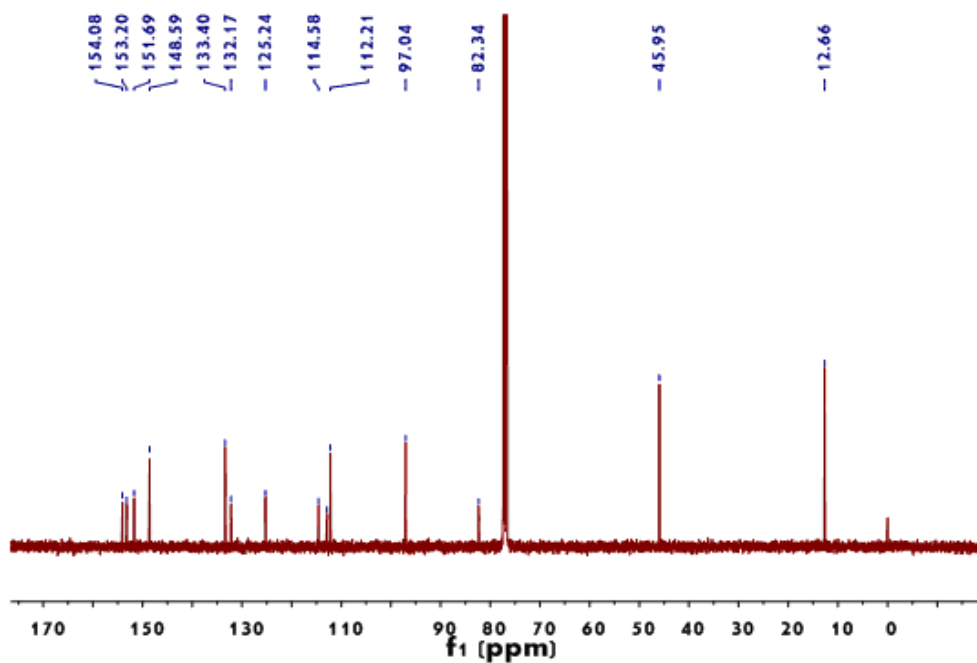

**Figure S19.** <sup>13</sup>C NMR spectrum of compound **1** in CDCl<sub>3</sub>

# **Single Mass Analysis (displaying only valid results)**

Tolerance = 5.0 PPM / DBE: min = -200.0, max = 200.0

Selected filters: None

Monoisotopic Mass, Even Electron Ions

13 formula(e) evaluated with 1 results within limits (all results (up to 1000) for each mass)

Elements Used:

C: 0-150 H: 0-150 N: 4-4 O: 2-2 Na: 1-1

SW

12021608 20 (0.521) AM (Top, 4, Ar, 5000.0, 475.28, 1.00, LS 10); Sm (Mn, 2x1.00); Sb (1, 40.00); Cm (15:24)

14:08:24  
1: TOF MS ES+  
1.30e4

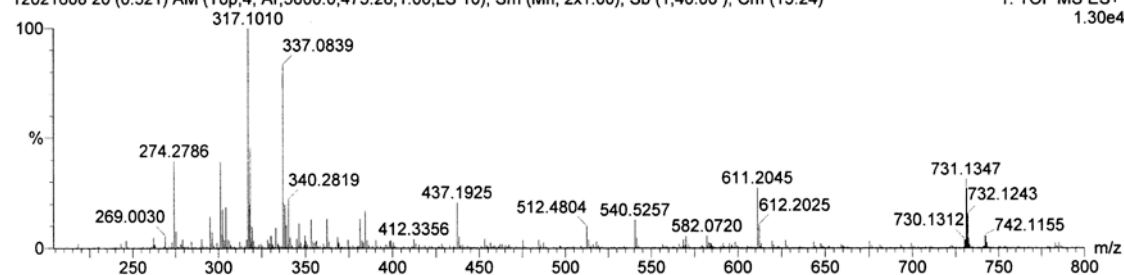

Minimum: -200.0  
Maximum: 5.0 5.0 200.0

| Mass     | Calc. Mass | mDa  | PPM  | DBE  | i-FIT | Formula          |
|----------|------------|------|------|------|-------|------------------|
| 317.1010 | 317.1014   | -0.4 | -1.3 | 11.5 | 15.5  | C16 H14 N4 O2 Na |

**Figure S20.** TOF-MS spectrum of compound **1**
